# Supplementary material for: A Database of Aircraft Measurements of Carbon Monoxide (CO) with High Temporal and Spatial Resolution during 2011–2021
Source: Copernicus journal article supplement (doi:10.5194/essd-2023-82), 2023-03-22
Supplement: Supplementary file 1 [file essd-2023-82-supplement.pdf]

# **A Database of Aircraft Measurements of Carbon Monoxide (CO) with High Temporal and Spatial Resolution during 2011 – 2021**

Chaoyang Xue<sup>1</sup>, Gisèle Krysztofiak<sup>1</sup>, Vanessa Brocchi<sup>1</sup>, Stéphane Chevrier<sup>1</sup>, Michel Chartier<sup>1</sup>, Patrick Jacquet<sup>1</sup>, Claude Robert<sup>1</sup>, Valéry Catoire<sup>1\*</sup>

<sup>1</sup>Laboratoire de Physique et Chimie de l'Environnement et de l'Espace (LPC2E), CNRS – Université Orléans – CNES (UMR 7328), 45071 Orléans cedex 2, France

# 1. Flights during the SHIVA campaign

The five transfer flights are only shown in Figure 20 in the main text.

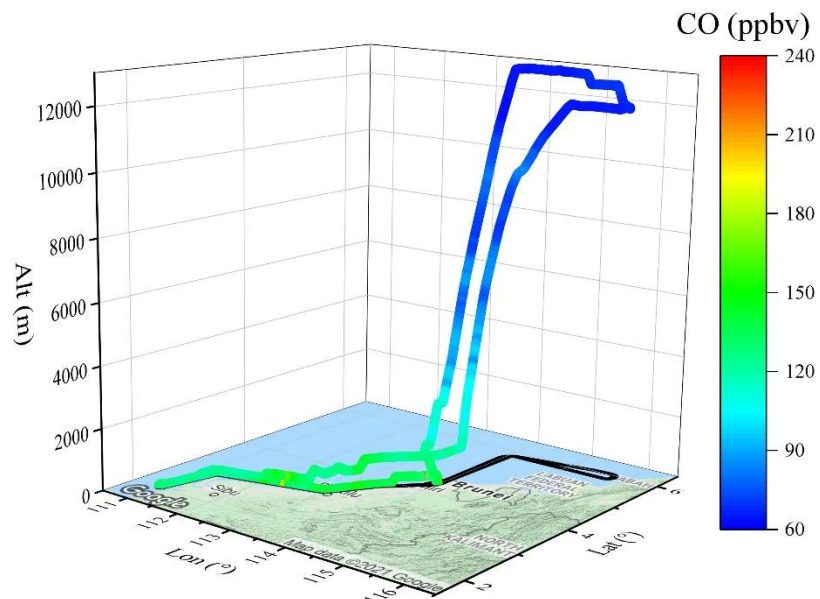

Figure S1: Flight trajectory colored by CO levels on flight-20111116\_1. Map copyright: © GoogleMap.

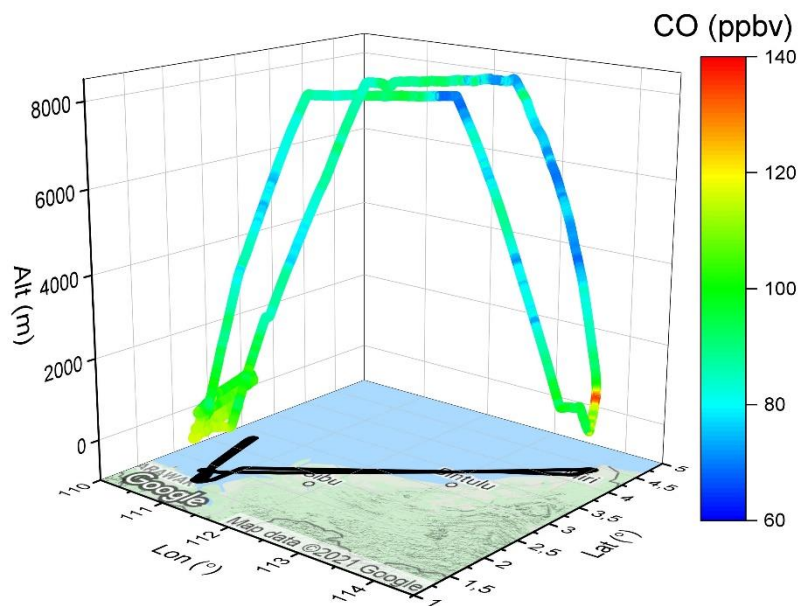

Figure S2: Flight trajectory colored by CO levels on flight-20111119\_1. Map copyright: © GoogleMap.

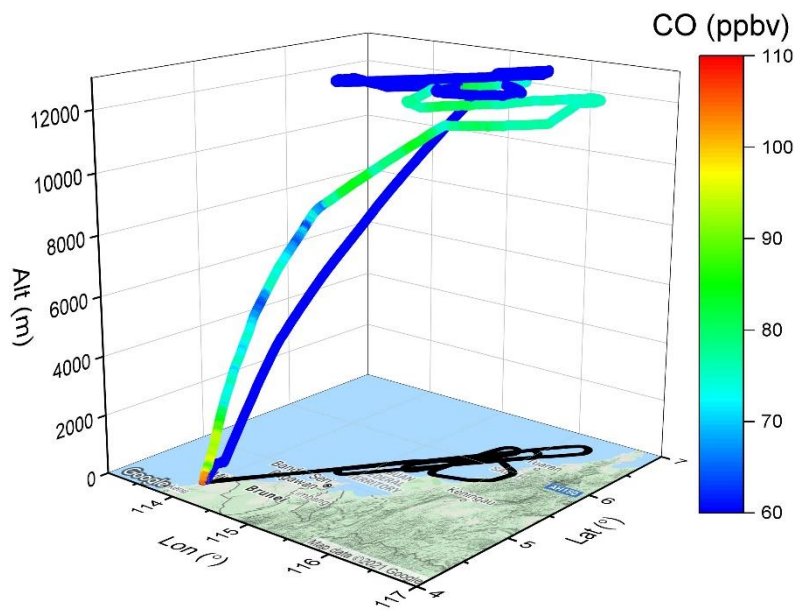

Figure S3: Flight trajectory colored by CO levels on flight-20111119\_2. Map copyright: © GoogleMap.

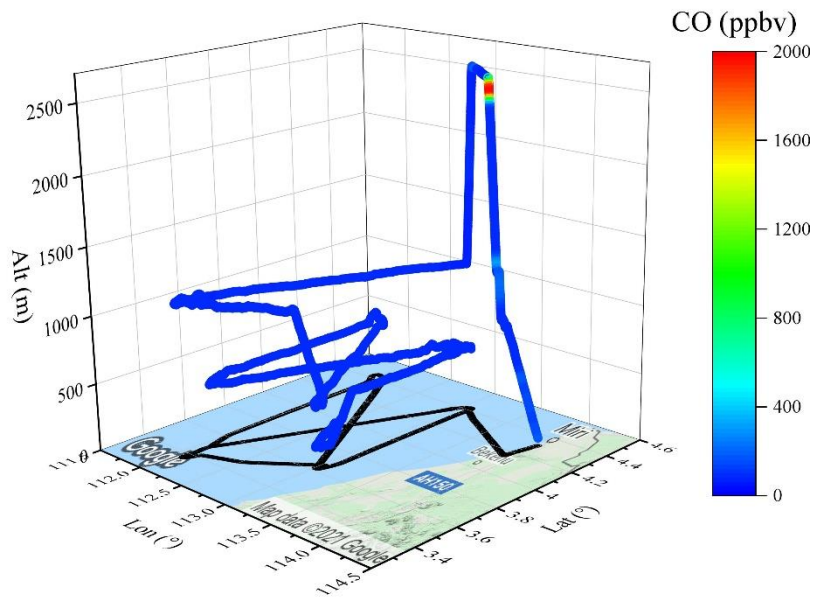

Figure S4: Flight trajectory colored by CO levels on flight-20111121\_1. Map copyright: © GoogleMap.

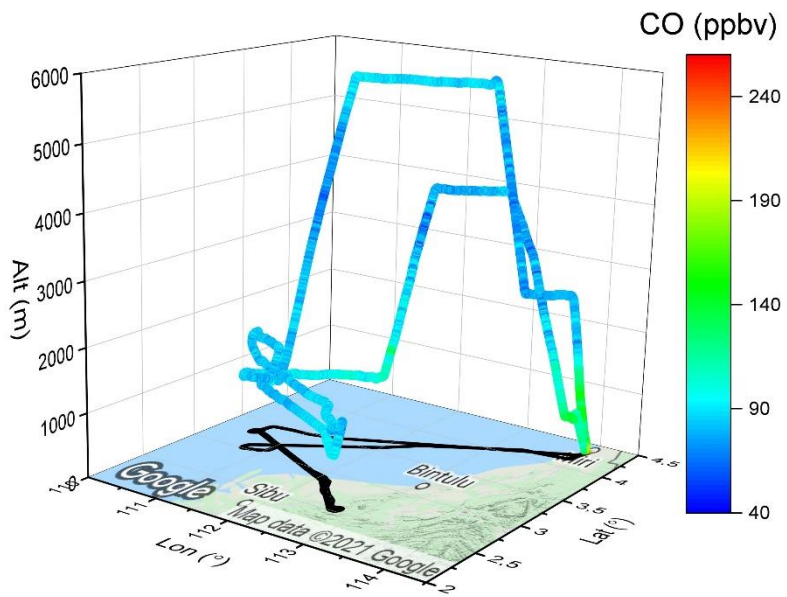

Figure S5: Flight trajectory colored by CO levels on flight-2011122\_1. Map copyright: © GoogleMap.

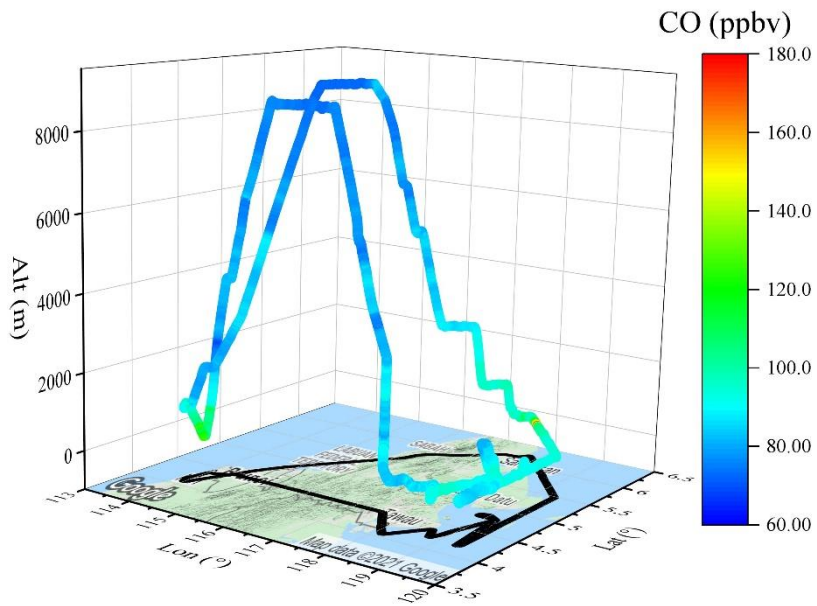

Figure S6: Flight trajectory colored by CO levels on flight-2011123\_1. Map copyright: © GoogleMap.

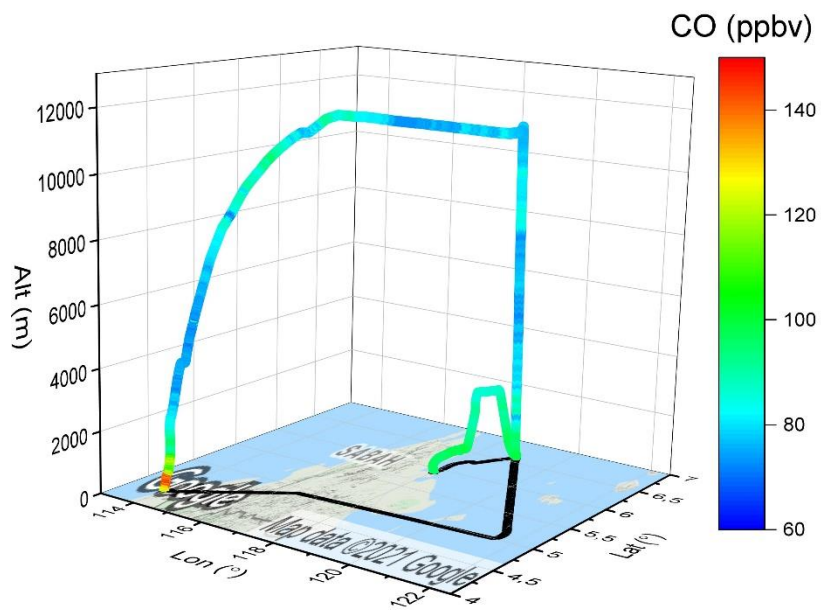

Figure S7: Flight trajectory colored by CO levels on flight-2011126\_1. Map copyright: © GoogleMap.

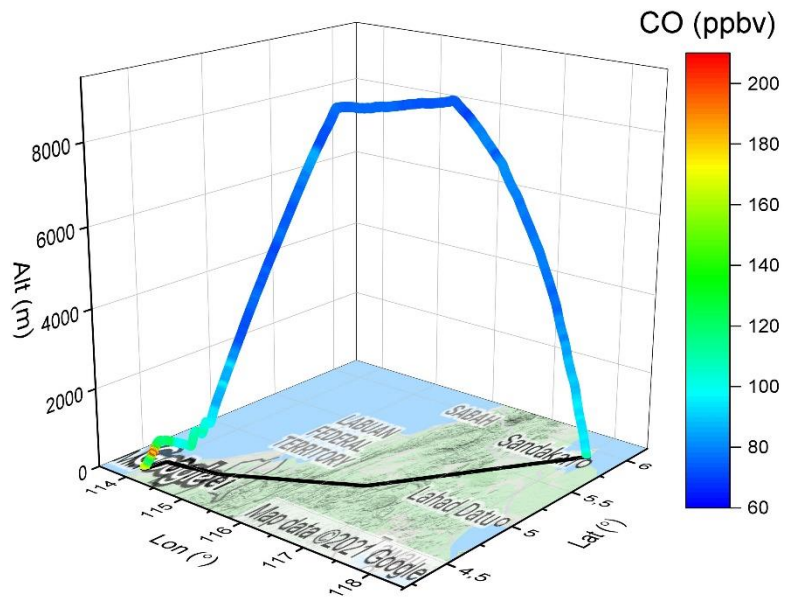

Figure S8: Flight trajectory colored by CO levels on flight-2011126\_2. Map copyright: © GoogleMap.

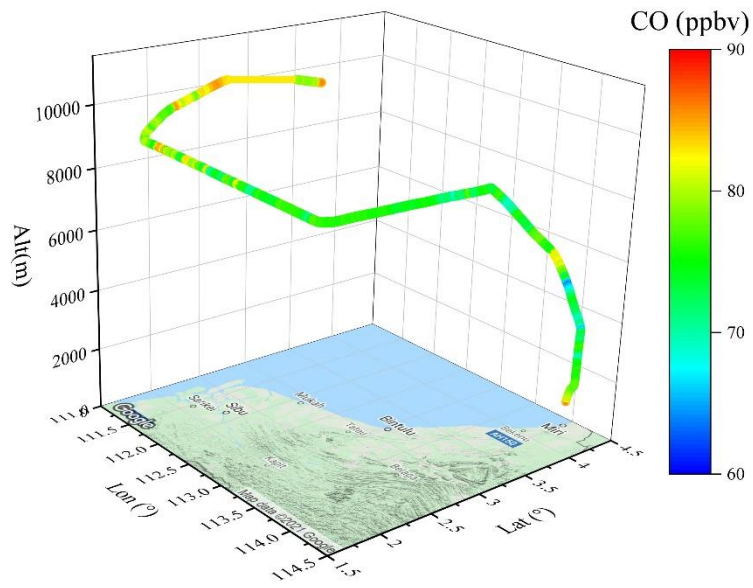

Figure S9: Flight trajectory colored by CO levels on flight-20111202\_1. Map copyright: © GoogleMap.

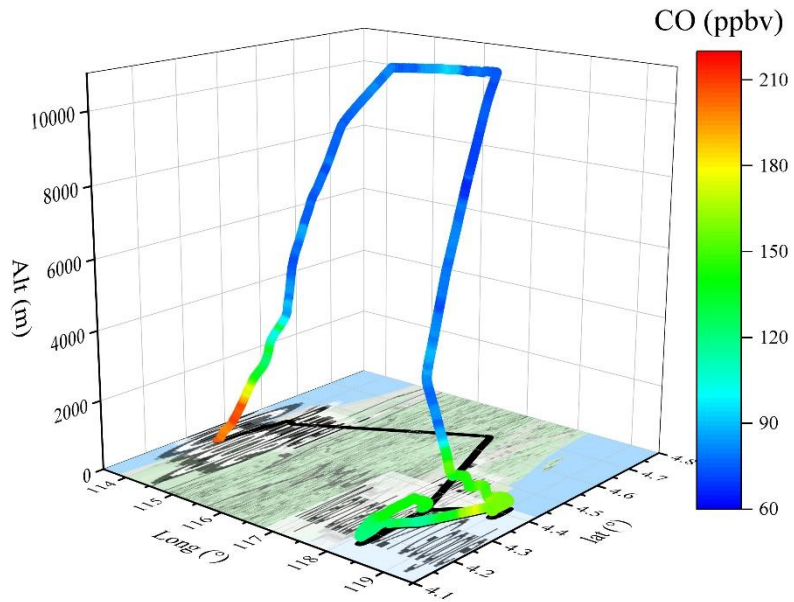

Figure S10: Flight trajectory colored by CO levels on flight-20111207\_1. Map copyright: © GoogleMap.

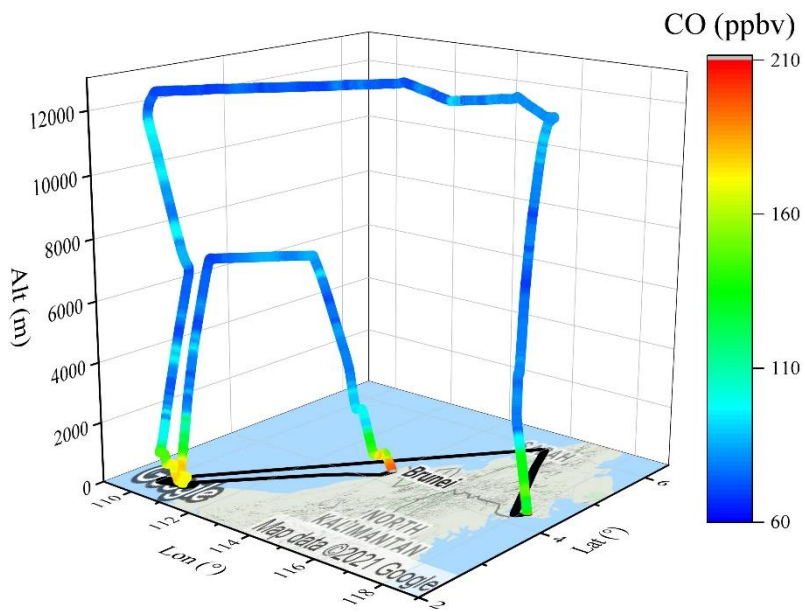

Figure S11: Flight trajectory colored by CO levels on flight-20111207\_2. Map copyright: © GoogleMap.

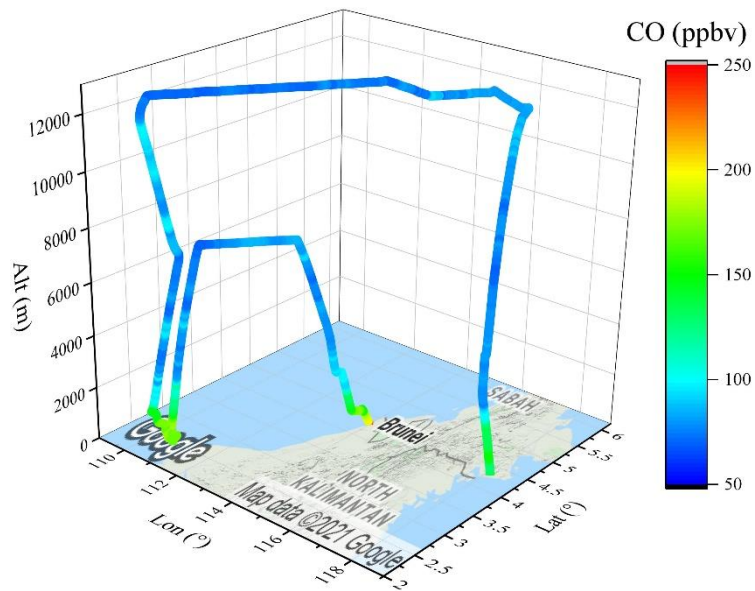

Figure S12: Flight trajectory colored by CO levels on flight-20111208\_1. Map copyright: © GoogleMap.

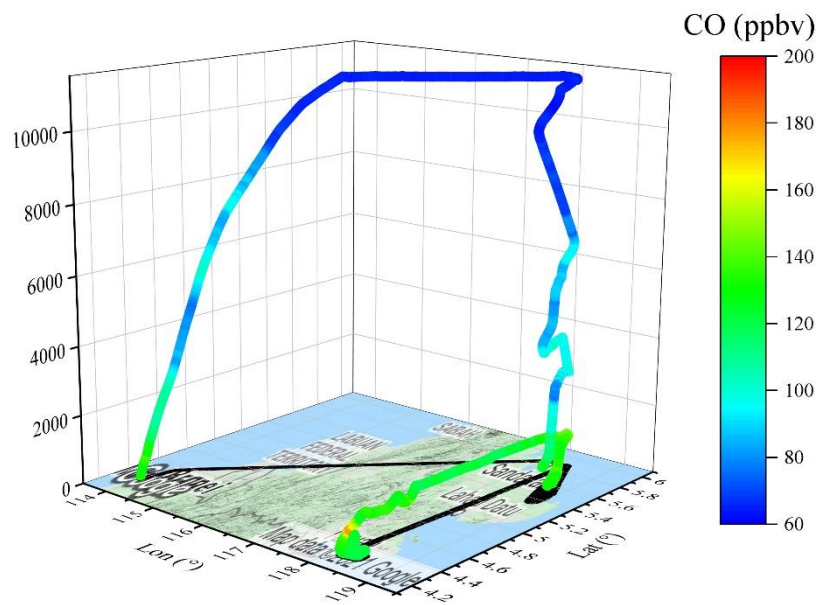

Figure S13: Flight trajectory colored by CO levels on flight-20111209\_1. Map copyright: © GoogleMap.

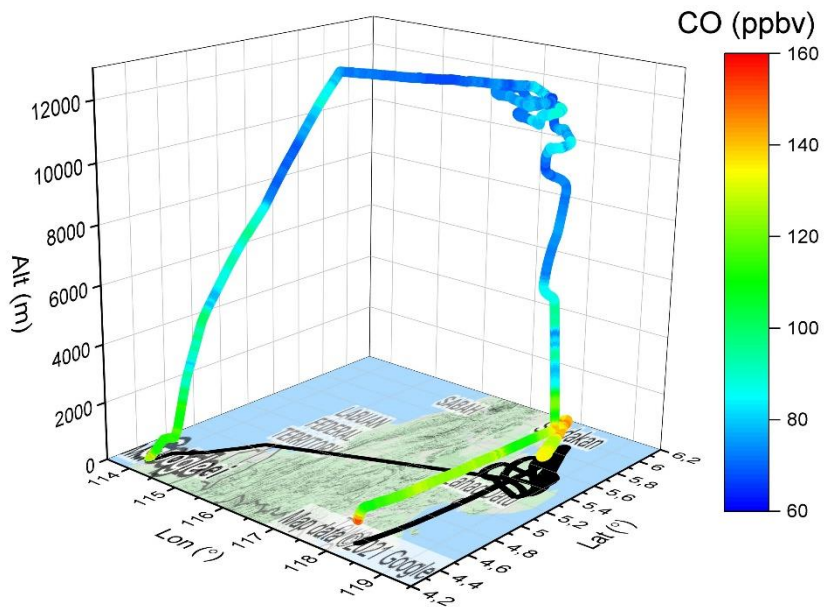

Figure S14: Flight trajectory colored by CO levels on flight-20111209\_2. Map copyright: © GoogleMap.



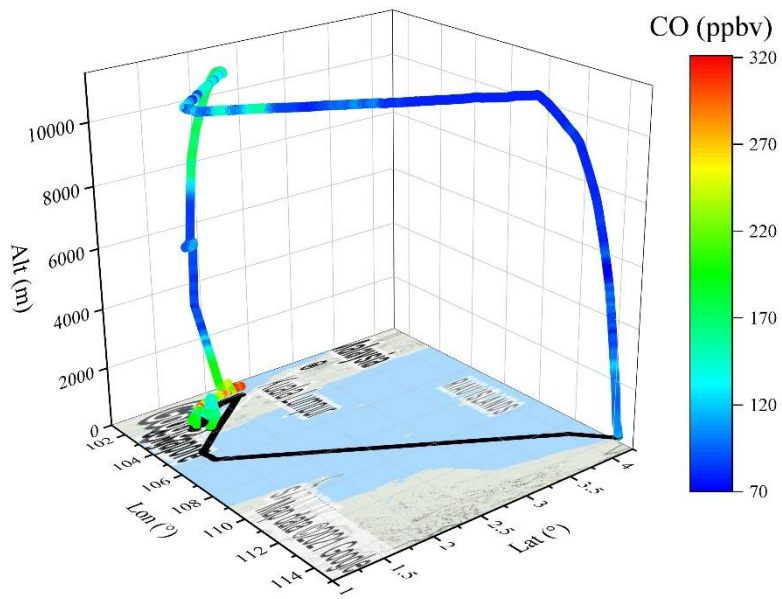

Figure S15: Flight trajectory colored by CO levels on flight-20111211\_1. Map copyright: © GoogleMap.

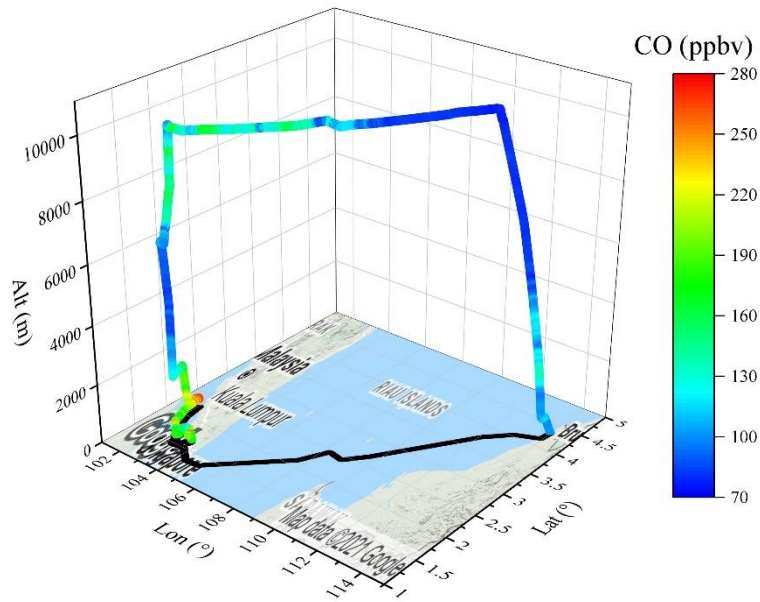

Figure S16: Flight trajectory colored by CO levels on flight-20111211\_2. Map copyright: © GoogleMap.

## 2. Flights during the TC2 campaign

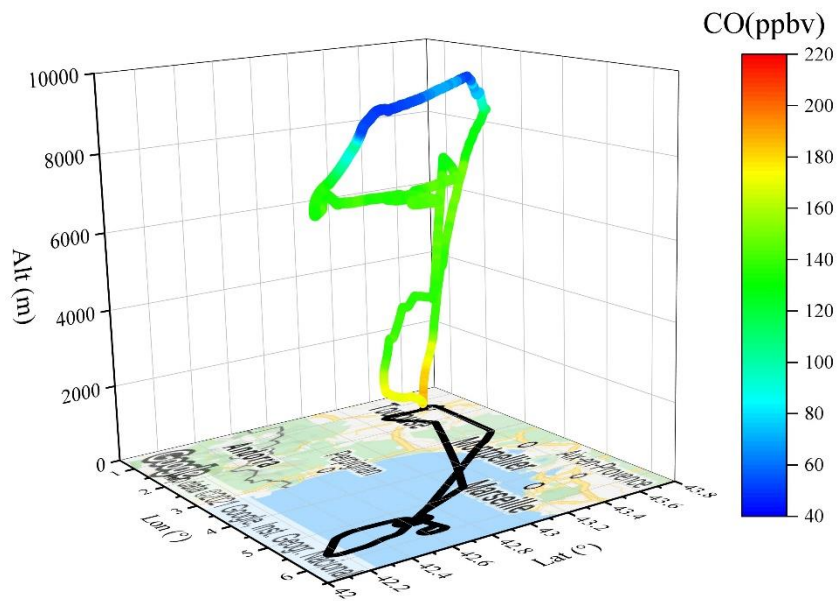

Figure S17: Flight trajectory colored by CO levels on flight-20130312\_1. Map copyright: © GoogleMap.

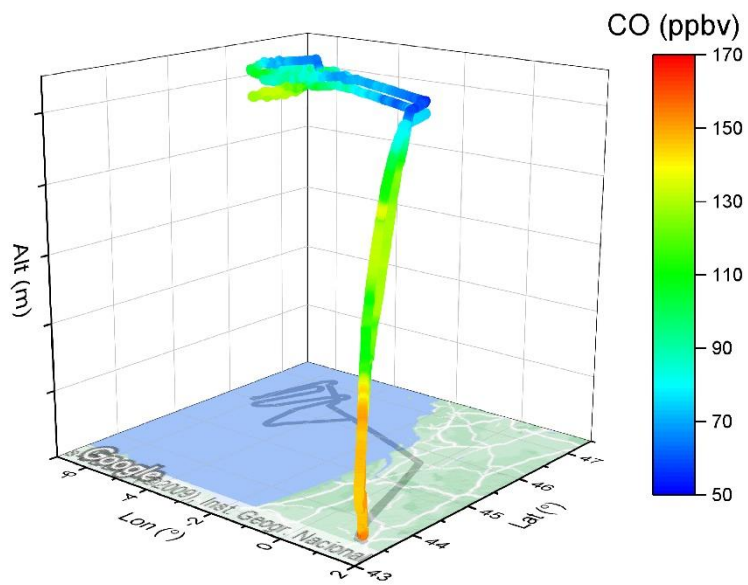

Figure S18: Flight trajectory colored by CO levels on flight-20130320\_1. Map copyright: © GoogleMap.

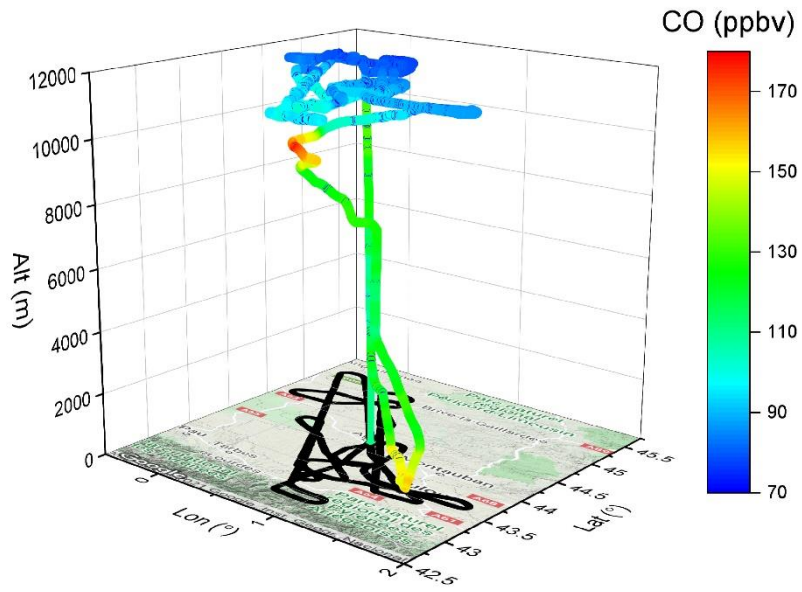

Figure S19: Flight trajectory colored by CO levels on flight-20130321\_1. Map copyright: © GoogleMap.

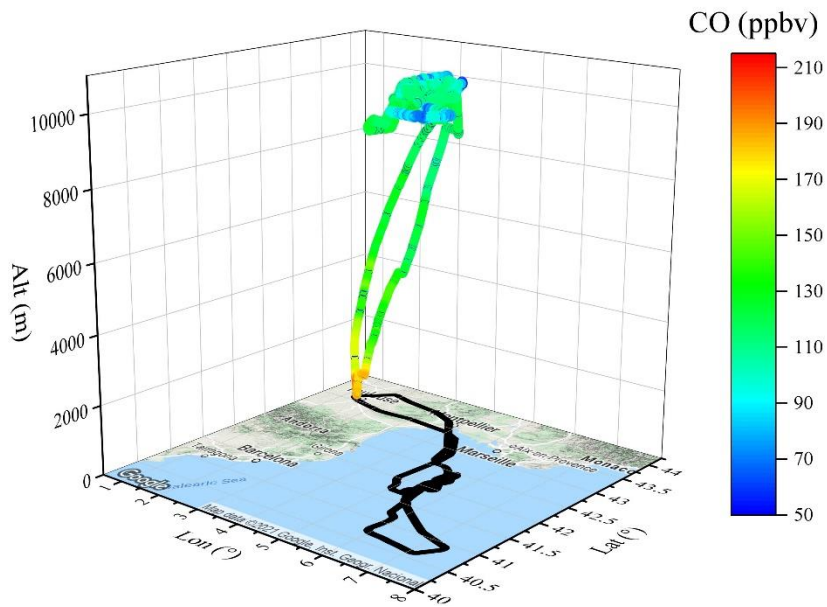

Figure S20: Flight trajectory colored by CO levels on flight-20130326\_1. Map copyright: © GoogleMap.

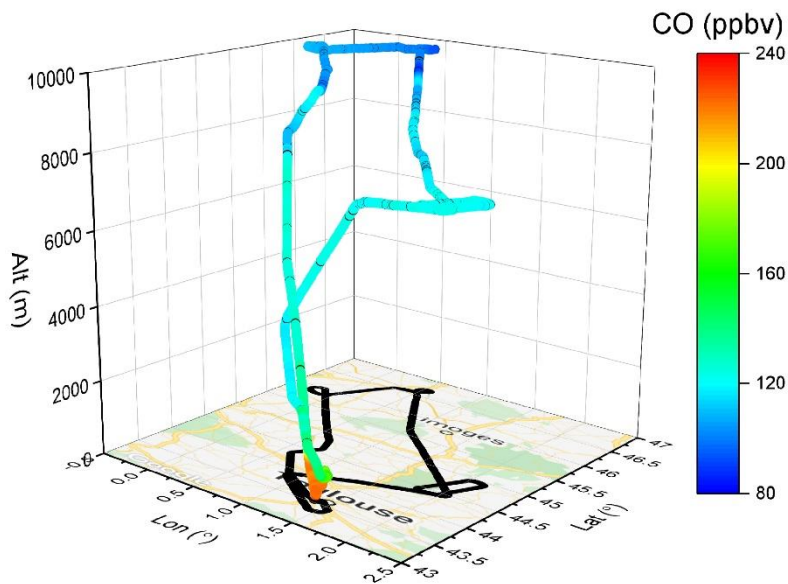

Figure S21: Flight trajectory colored by CO levels on flight-20130328\_1. Map copyright: © GoogleMap.

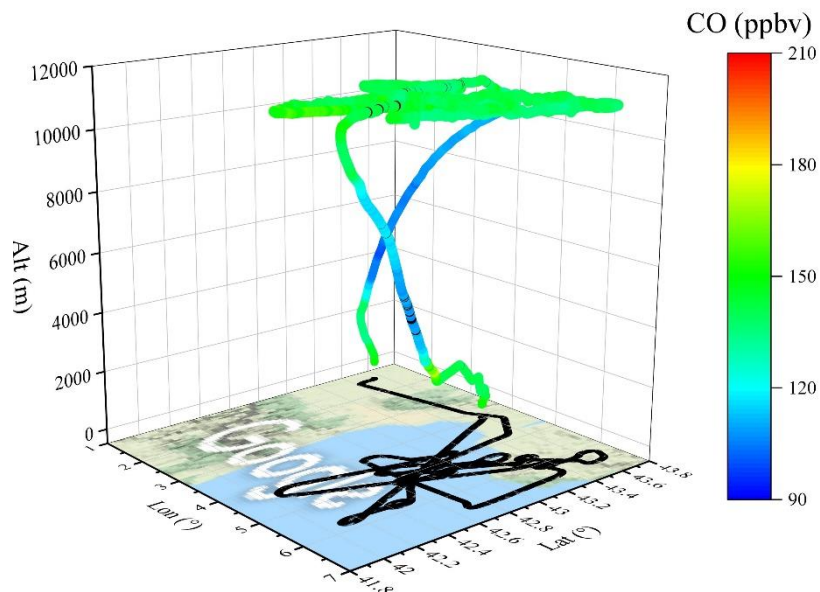

Figure S22: Flight trajectory colored by CO levels on flight-20130410\_1. Map copyright: © GoogleMap.

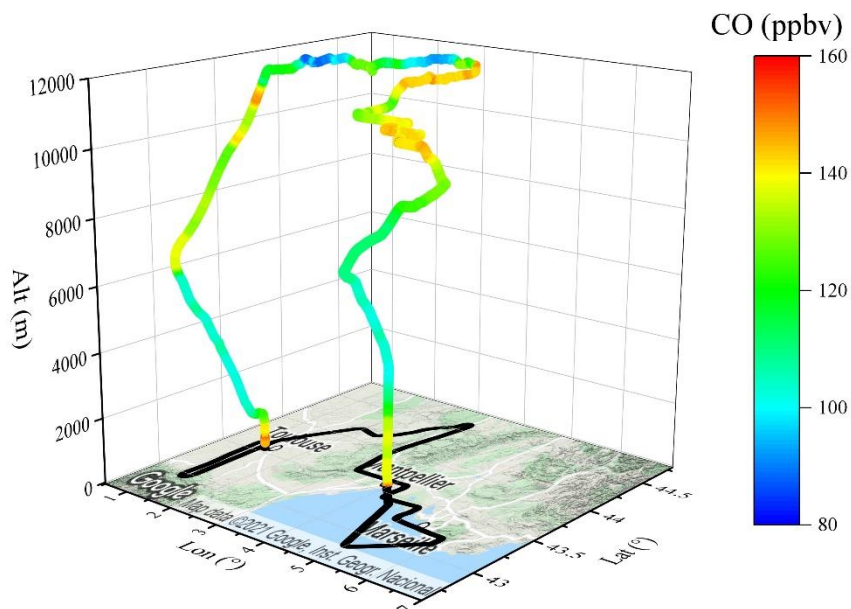

Figure S23: Flight trajectory colored by CO levels on flight-20130410\_2. Map copyright: © GoogleMap.

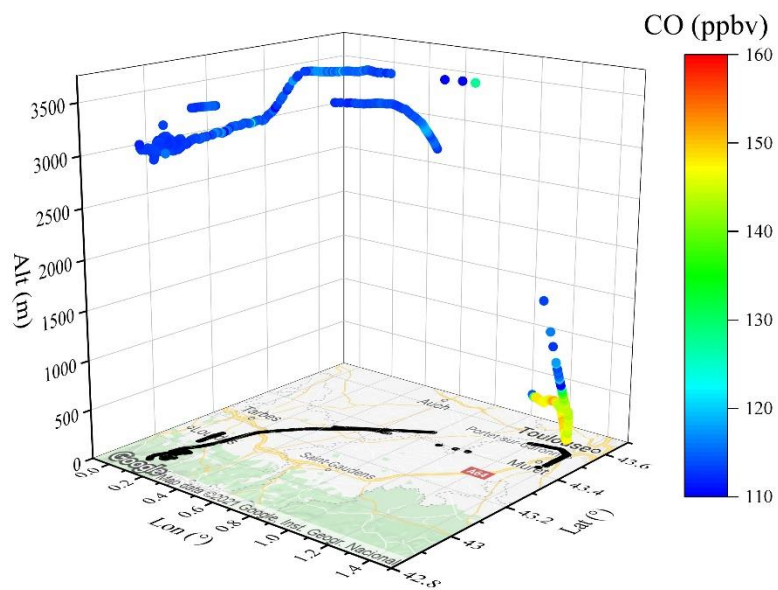

Figure S24: Flight trajectory colored by CO levels on flight-20130411\_1. Map copyright: © GoogleMap.

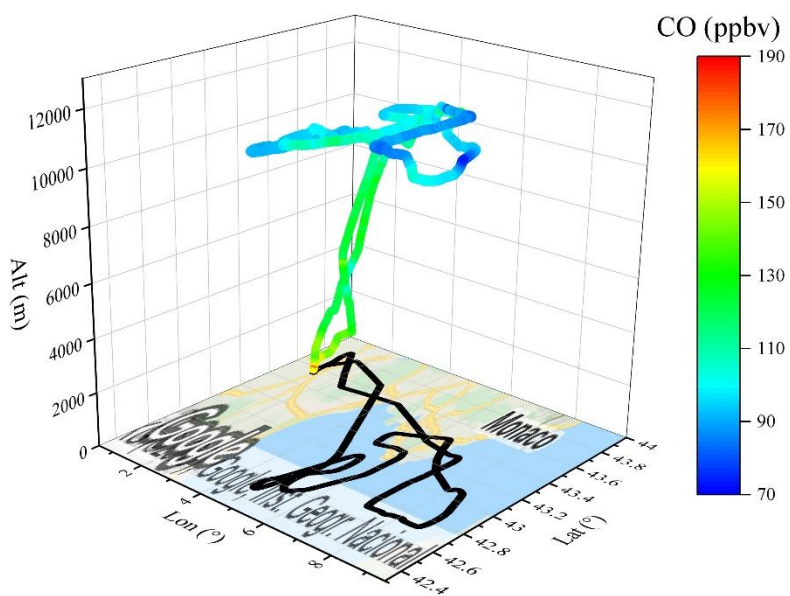

Figure S25: Flight trajectory colored by CO levels on flight-20130416\_1. Map copyright: © GoogleMap.

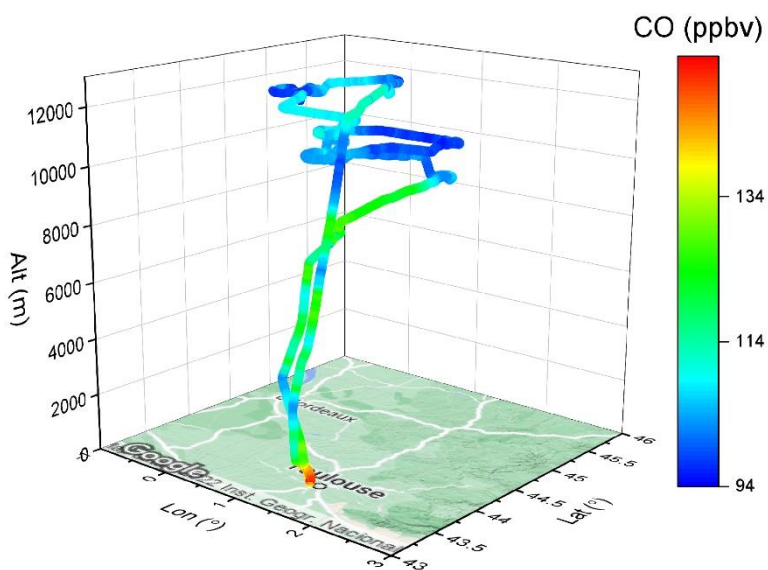

Figure S26: Flight trajectory colored by CO levels on flight-20130417\_1. Map copyright: © GoogleMap.

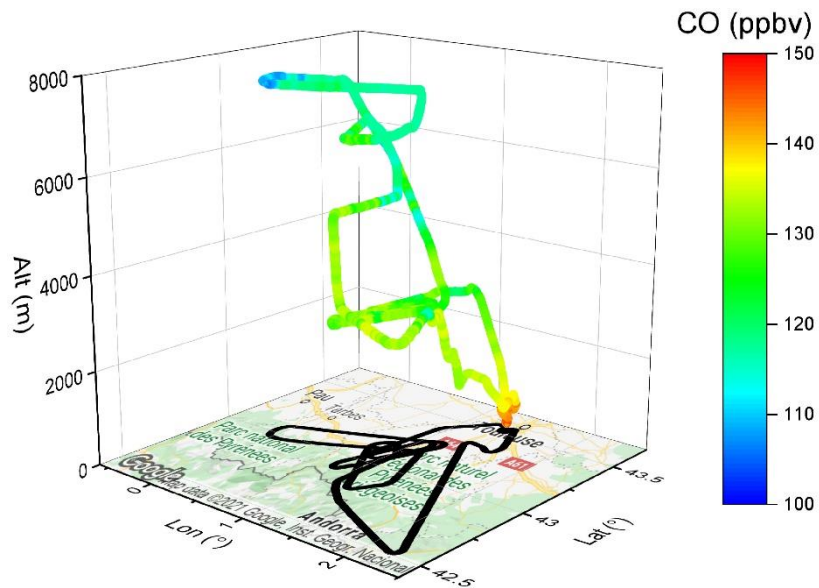

Figure S27: Flight trajectory colored by CO levels on flight-20130531\_1. Map copyright: © GoogleMap.

### 3. Flights during the ChemCallInt campaign

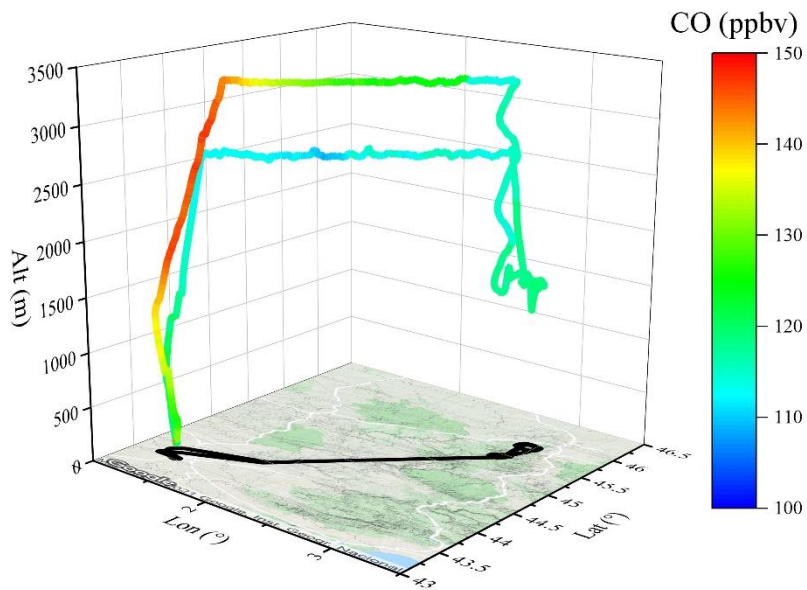

Figure S28: Flight trajectory colored by CO levels on flight-20140520\_1. Map copyright: © GoogleMap.

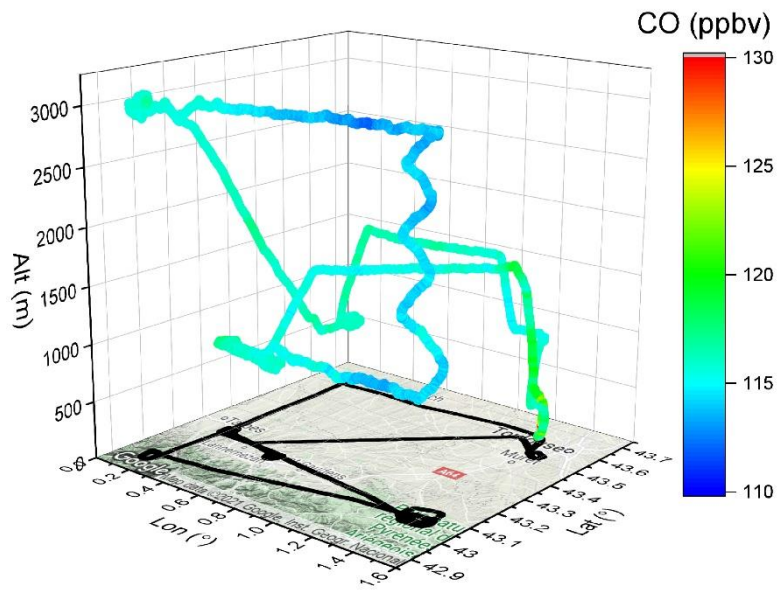

Figure S29: Flight trajectory colored by CO levels on flight-20140522\_1. Map copyright: © GoogleMap.

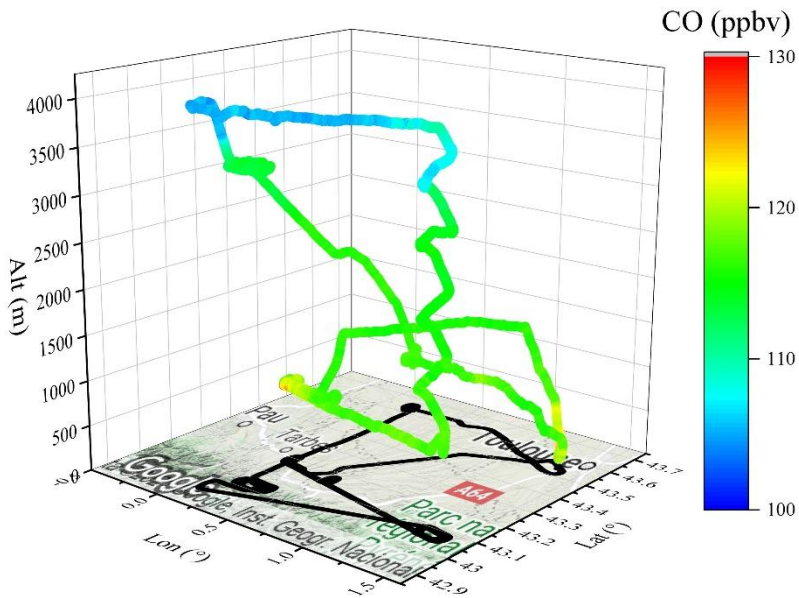

Figure S30: Flight trajectory colored by CO levels on flight-20140527\_1. Map copyright: © GoogleMap.

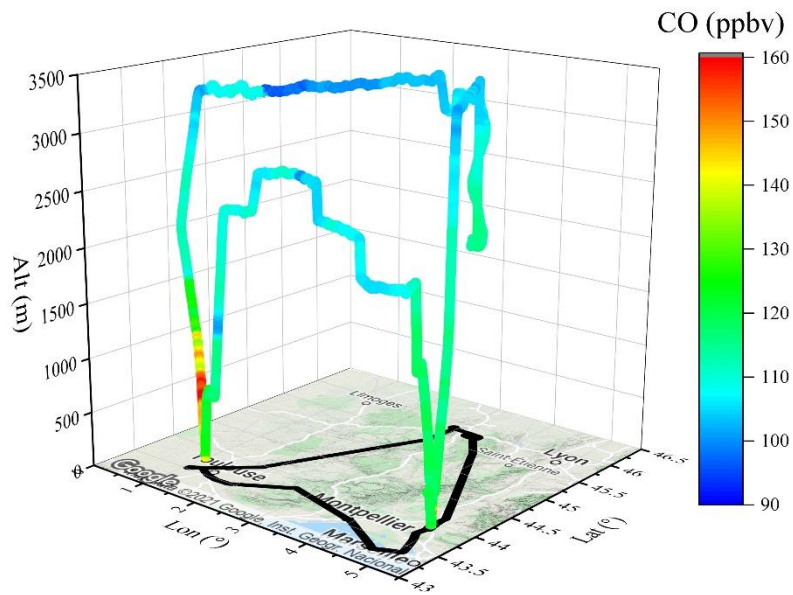

Figure S31: Flight trajectory colored by CO levels on flight-20140528\_1. Map copyright: © GoogleMap.

#### 4. Flights during the ChArME<sub>x</sub> – GLAM campaign

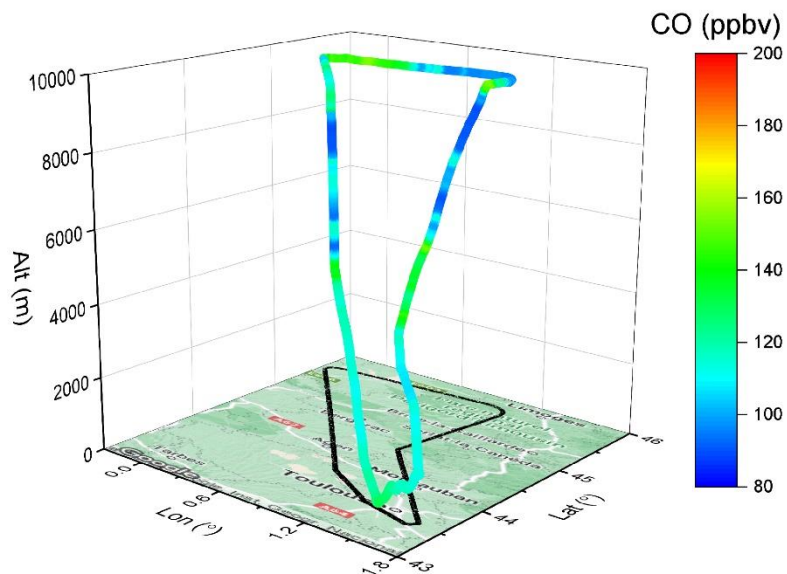

Figure S32: Flight trajectory colored by CO levels on flight-20140804\_1. Map copyright: © GoogleMap.



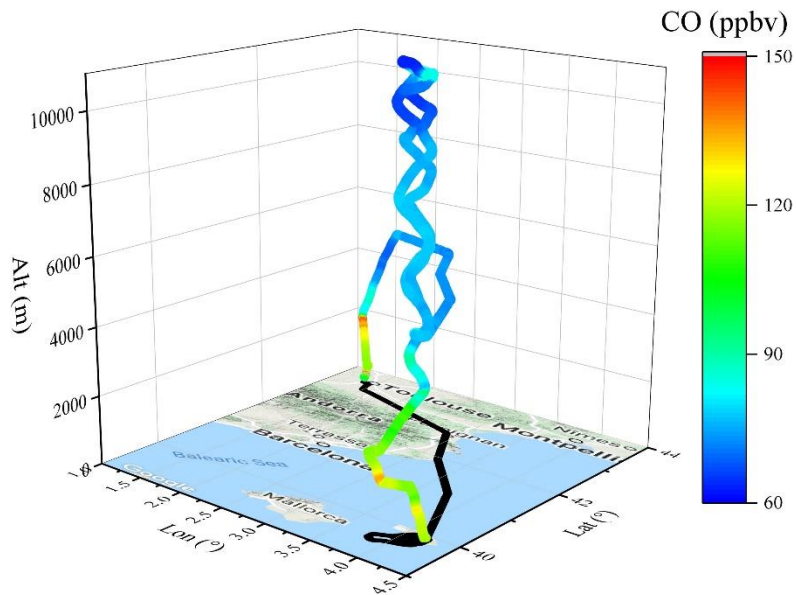

Figure S33: Flight trajectory colored by CO levels on flight-20140806\_1. Map copyright: © GoogleMap.

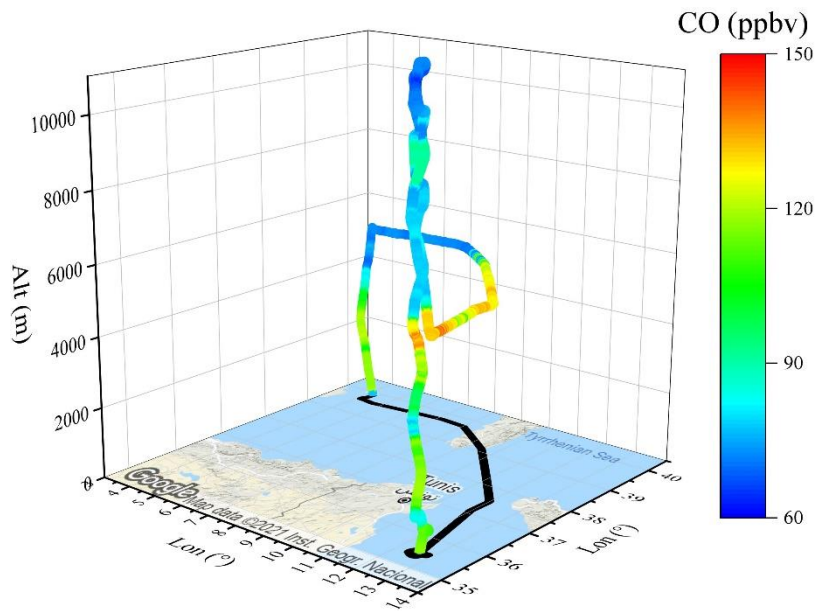

Figure S34: Flight trajectory colored by CO levels on flight-20140806\_2. Map copyright: © GoogleMap.

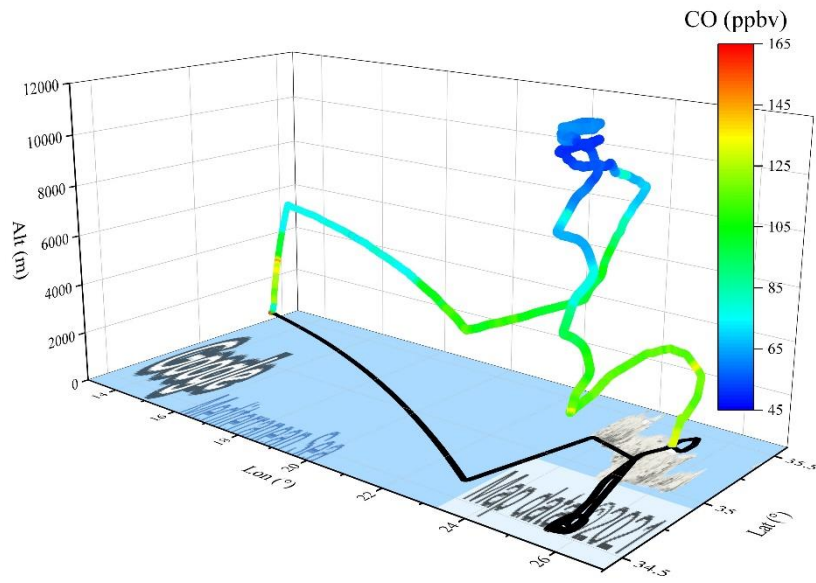

Figure S35: Flight trajectory colored by CO levels on flight-20140807\_1. Map copyright: © GoogleMap.

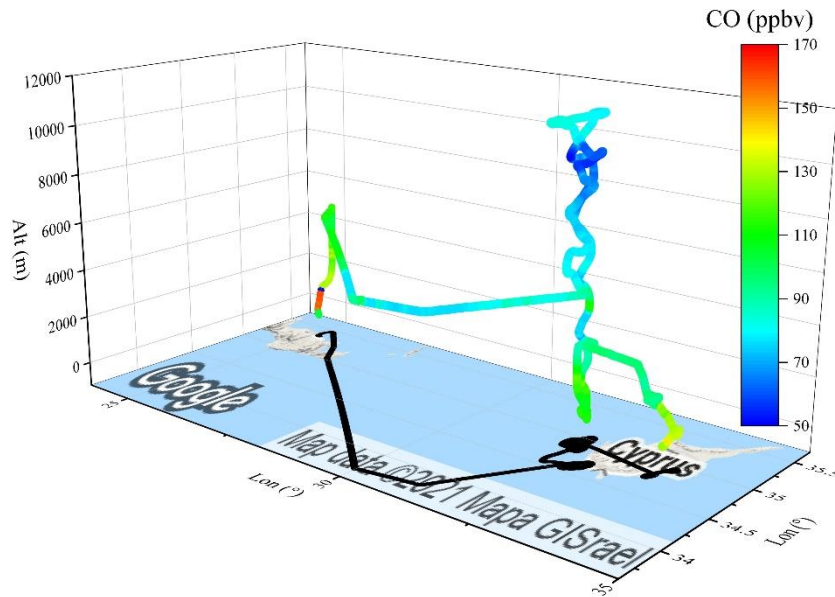

Figure S36: Flight trajectory colored by CO levels on flight-20140807\_2. Map copyright: © GoogleMap.

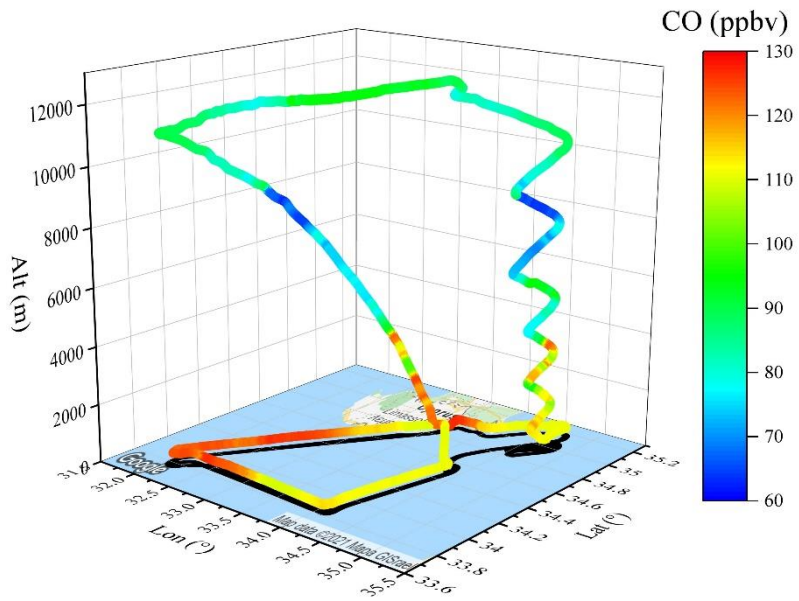

Figure S37: Flight trajectory colored by CO levels on flight-20140808\_1. Map copyright: © GoogleMap.

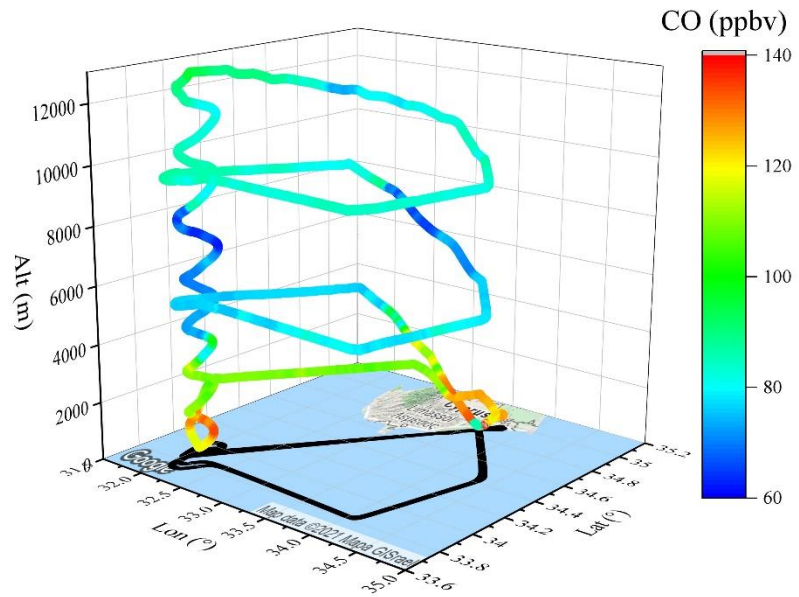

Figure S38: Flight trajectory colored by CO levels on flight-20140808\_2. Map copyright: © GoogleMap.

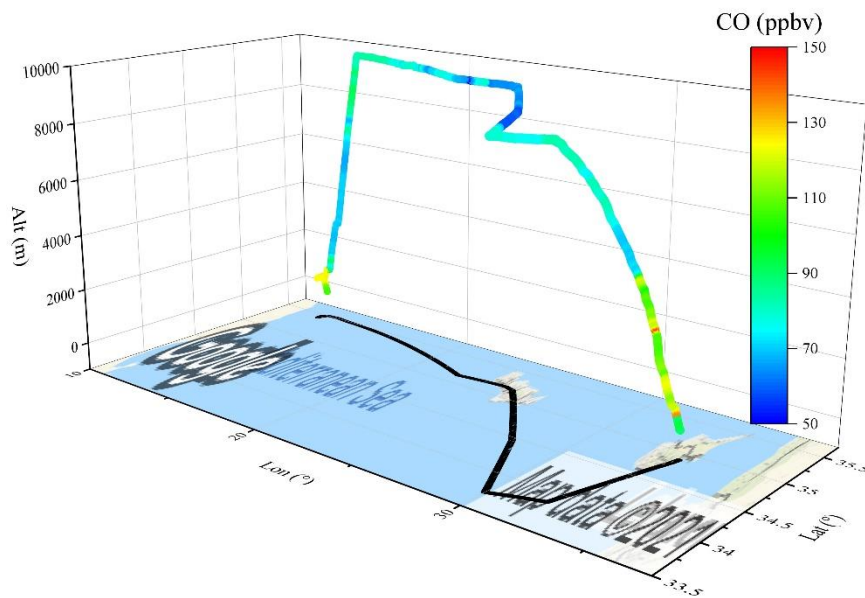

Figure S39: Flight trajectory colored by CO levels on flight-20140810\_1. Map copyright: © GoogleMap.

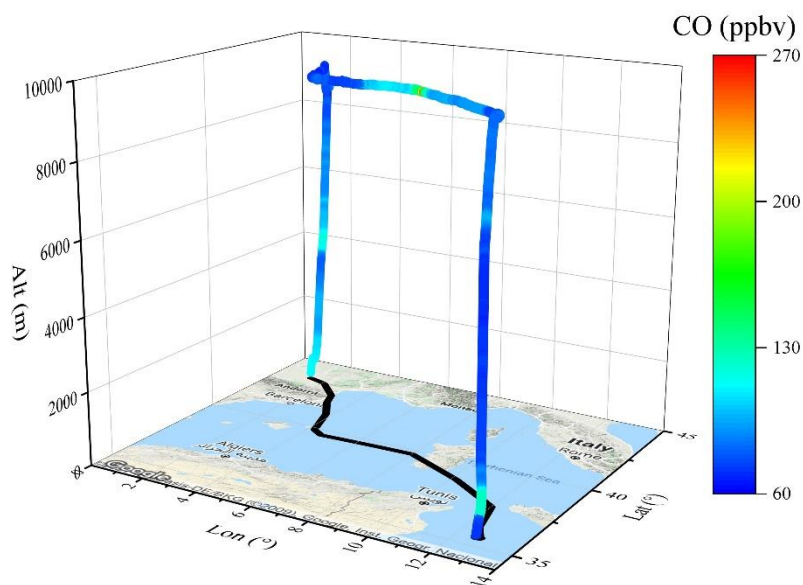

Figure S40: Flight trajectory colored by CO levels on flight-20140810\_2. Map copyright: © GoogleMap.

## 5. Flights during the Test-sur-ATR42 campaign

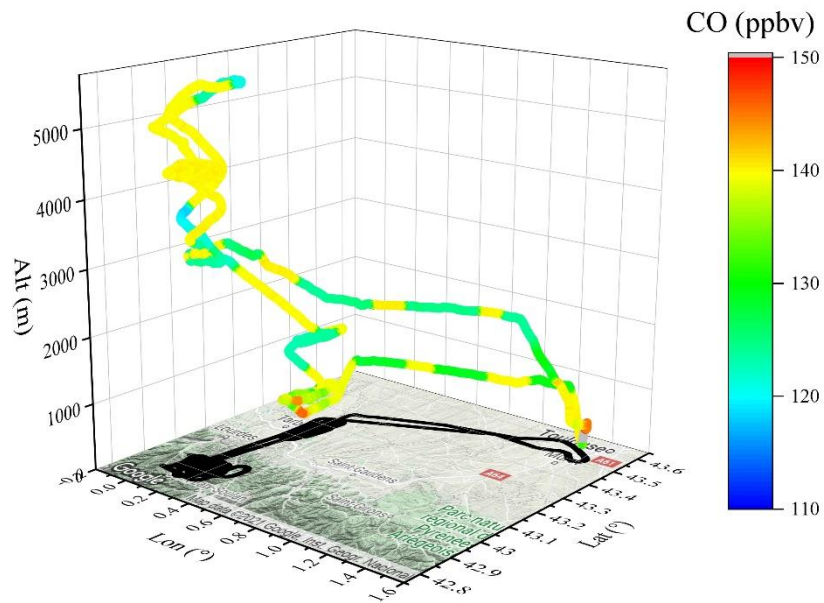

Figure S41: Flight trajectory colored by CO levels on flight-20160205\_1. Map copyright: © GoogleMap.

## 6. Flights during the DACCIWA campaign

The five transfer flights are only shown in Figure 21 in the main text.

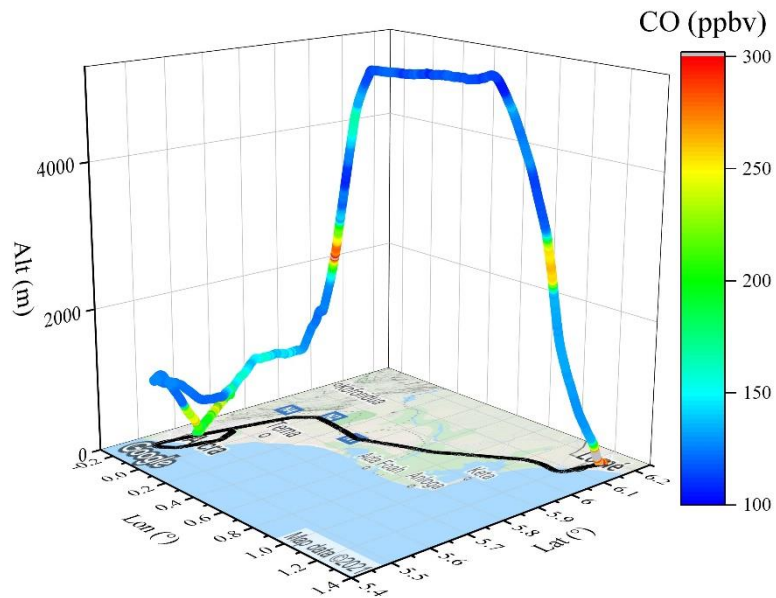

Figure S42: Flight trajectory colored by CO levels on flight-20160628\_1. Map copyright: © GoogleMap.

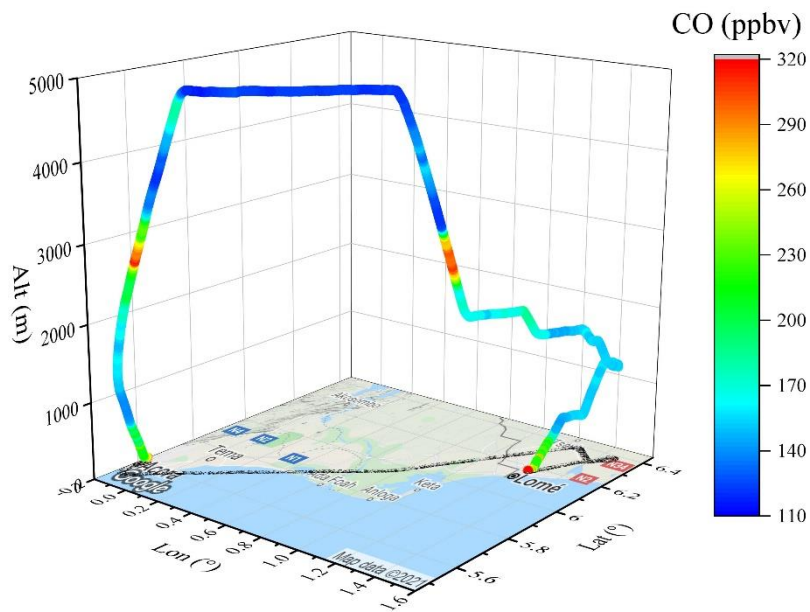

Figure S43: Flight trajectory colored by CO levels on flight-20160628\_2. Map copyright: © GoogleMap.

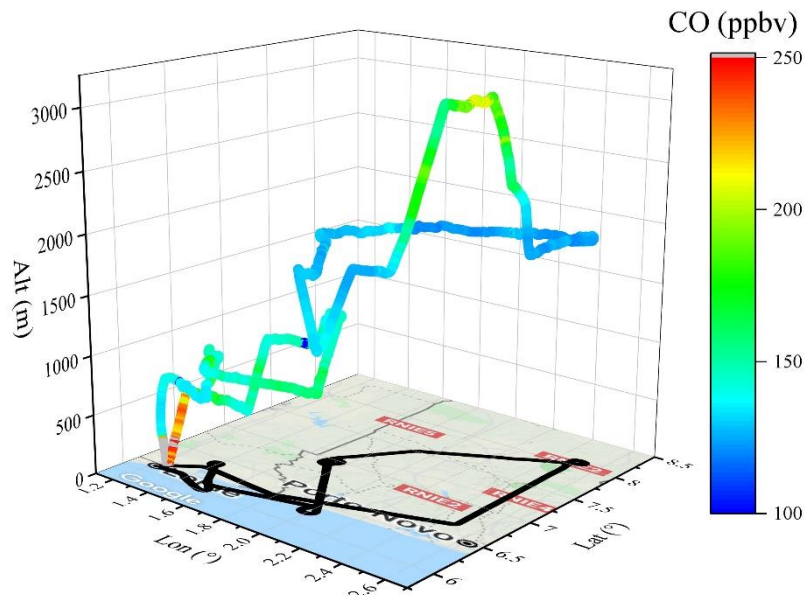

Figure S44: Flight trajectory colored by CO levels on flight-20160629\_1. Map copyright: © GoogleMap.

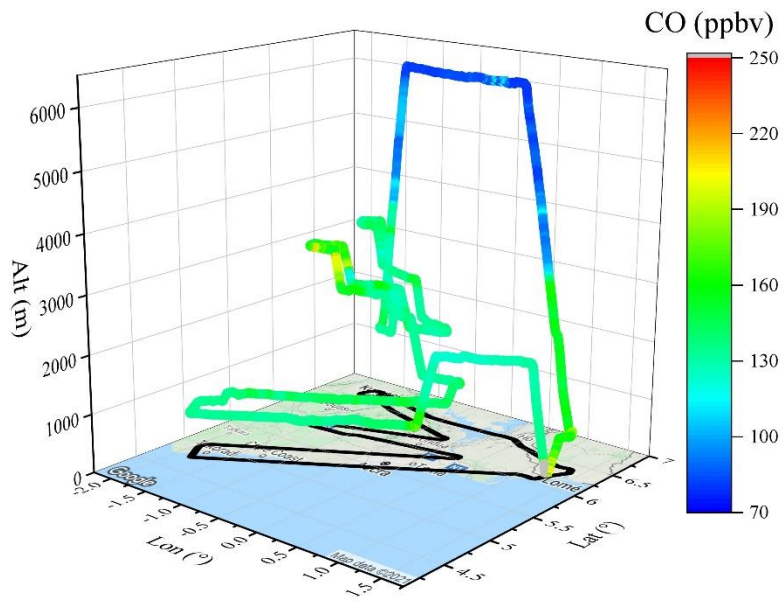

Figure S45: Flight trajectory colored by CO levels on flight-20160630\_1. Map copyright: © GoogleMap.

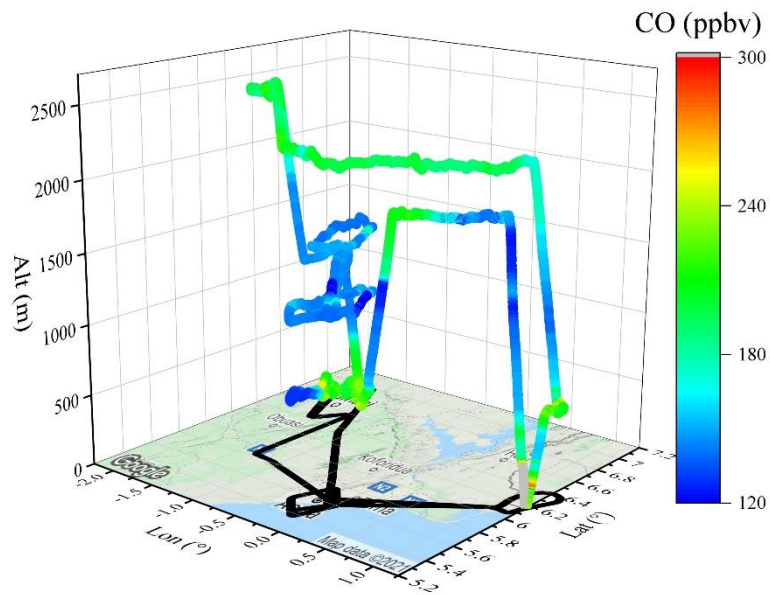

Figure S46: Flight trajectory colored by CO levels on flight-20160701\_1. Map copyright: © GoogleMap.

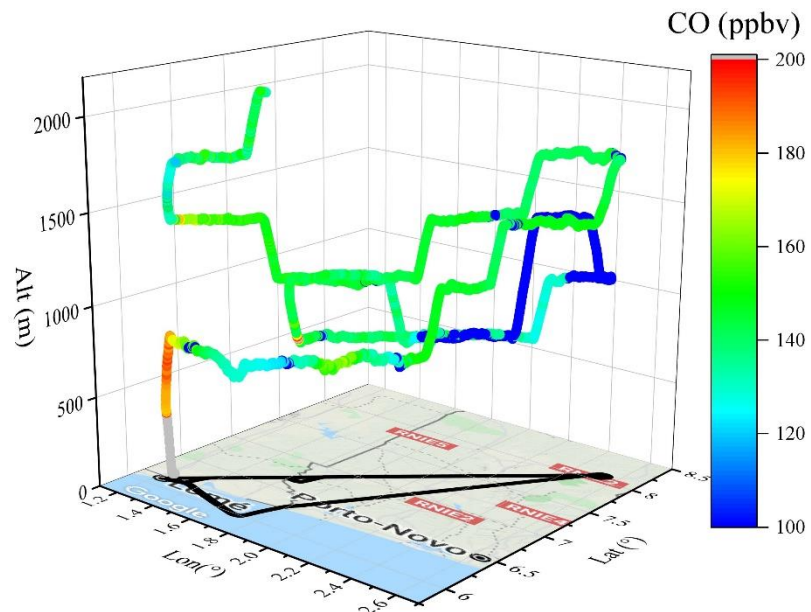

Figure S47: Flight trajectory colored by CO levels on flight-20160705\_1. Map copyright: © GoogleMap.

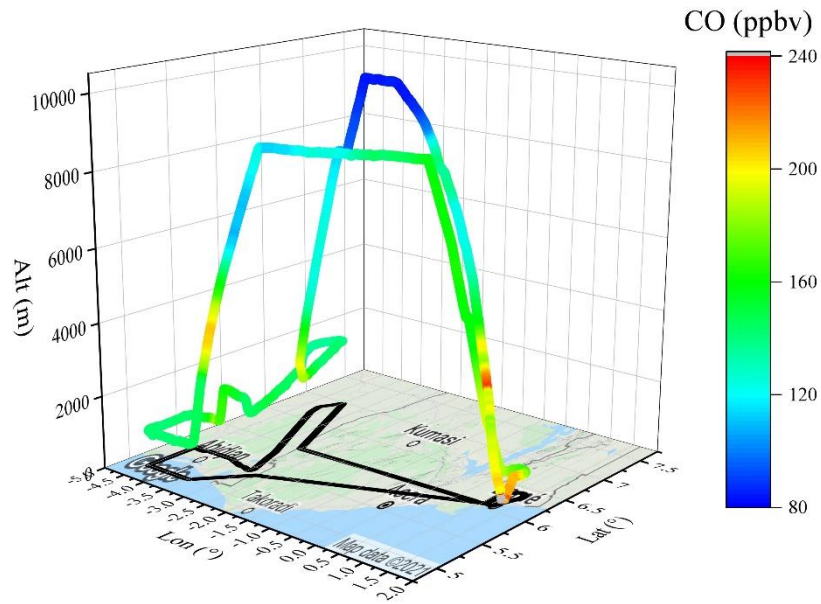

Figure S48: Flight trajectory colored by CO levels on flight-20160706\_1. Map copyright: © GoogleMap.



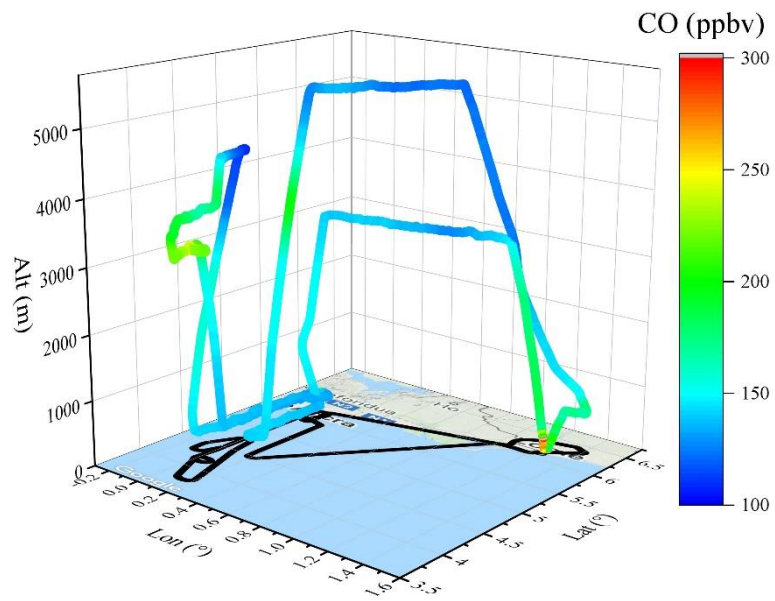

Figure S49: Flight trajectory colored by CO levels on flight-20160707\_1. Map copyright: © GoogleMap.

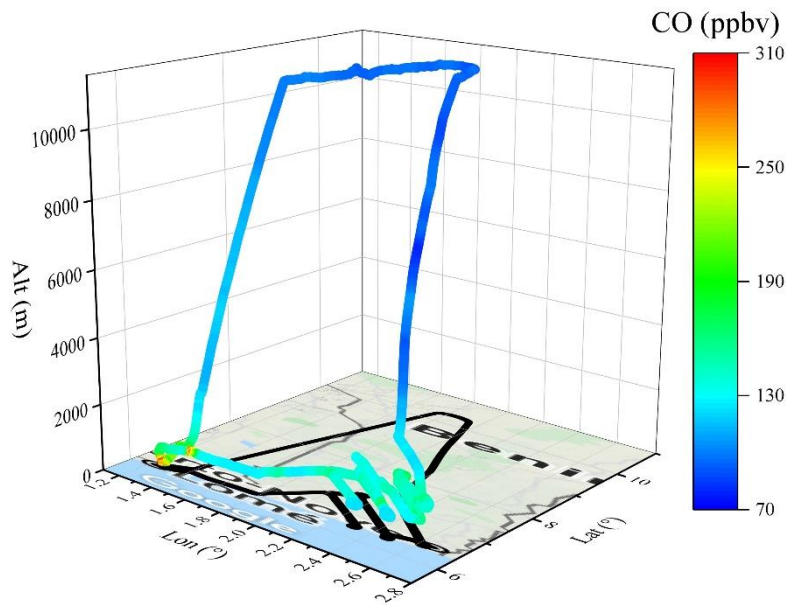

Figure S50: Flight trajectory colored by CO levels on flight-20160708\_1. Map copyright: © GoogleMap.

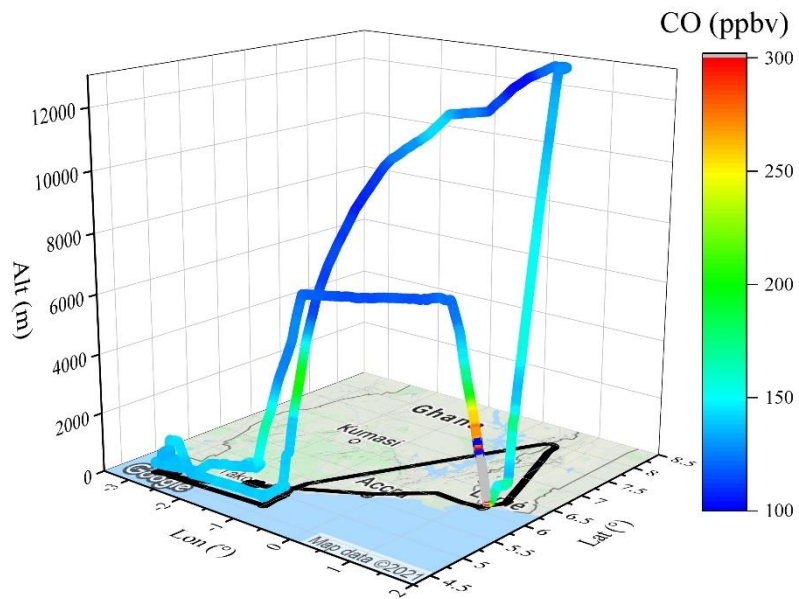

Figure S51: Flight trajectory colored by CO levels on flight-20160710\_1. Map copyright: © GoogleMap.

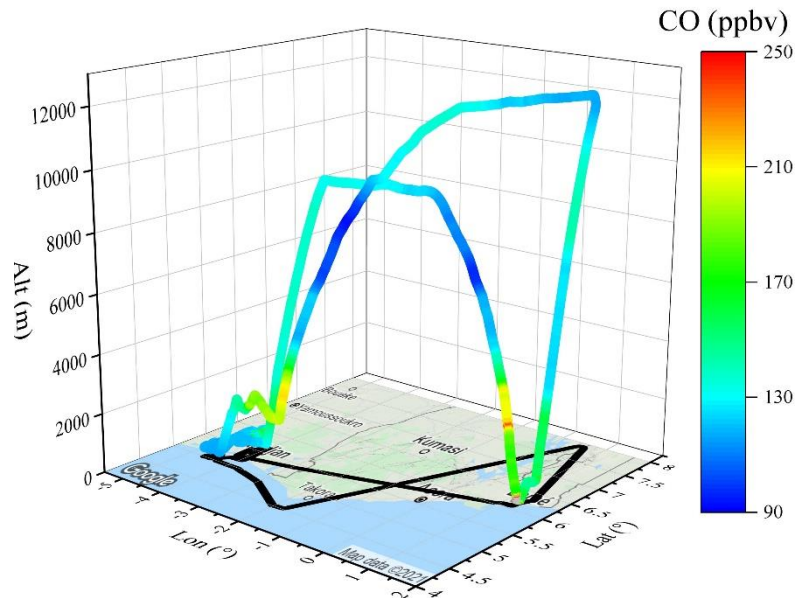

Figure S52: Flight trajectory colored by CO levels on flight-20160711\_1. Map copyright: © GoogleMap.

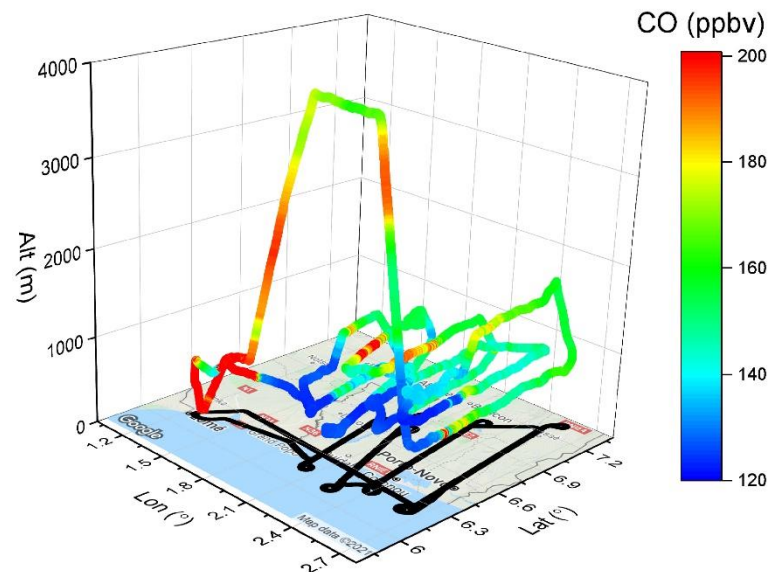

Figure S53: Flight trajectory colored by CO levels on flight-20160712\_1. Map copyright: © GoogleMap.

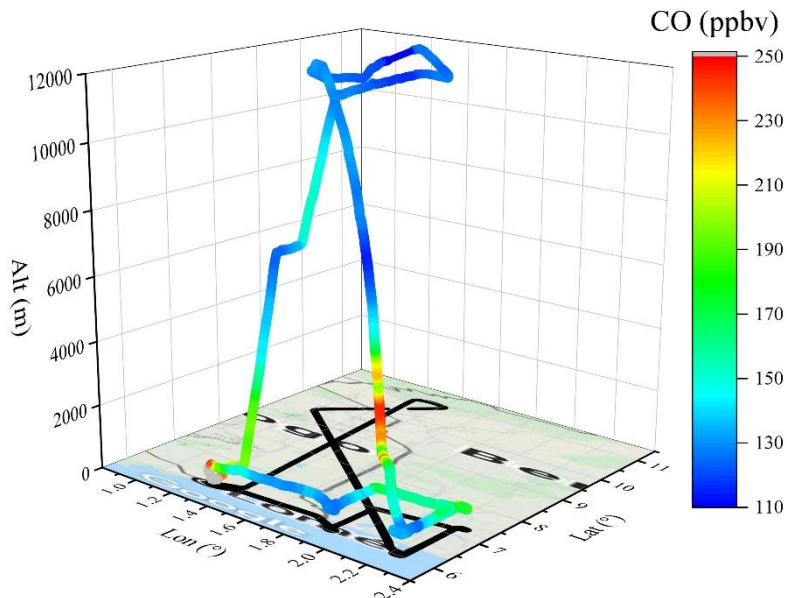

Figure S54: Flight trajectory colored by CO levels on flight-20160713\_1. Map copyright: © GoogleMap.

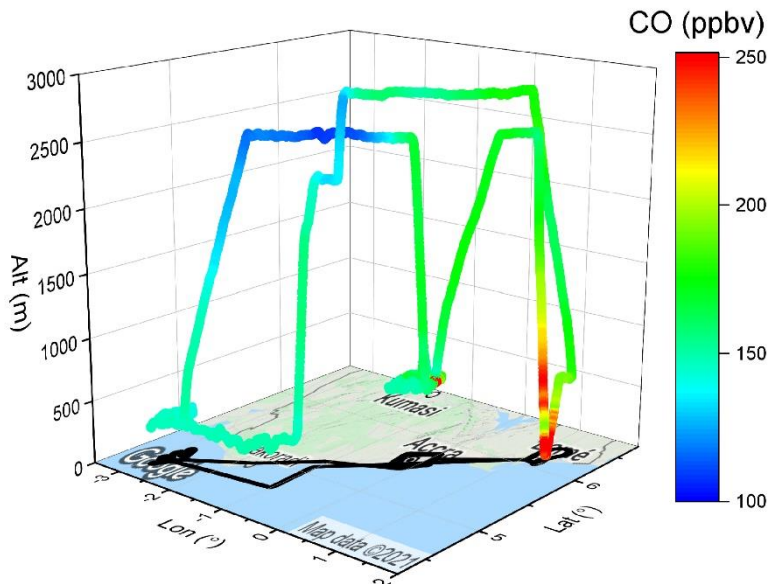

Figure S55: Flight trajectory colored by CO levels on flight-20160714\_1. Map copyright: © GoogleMap.

## 7. Flights during the MAGIC-2019 campaign

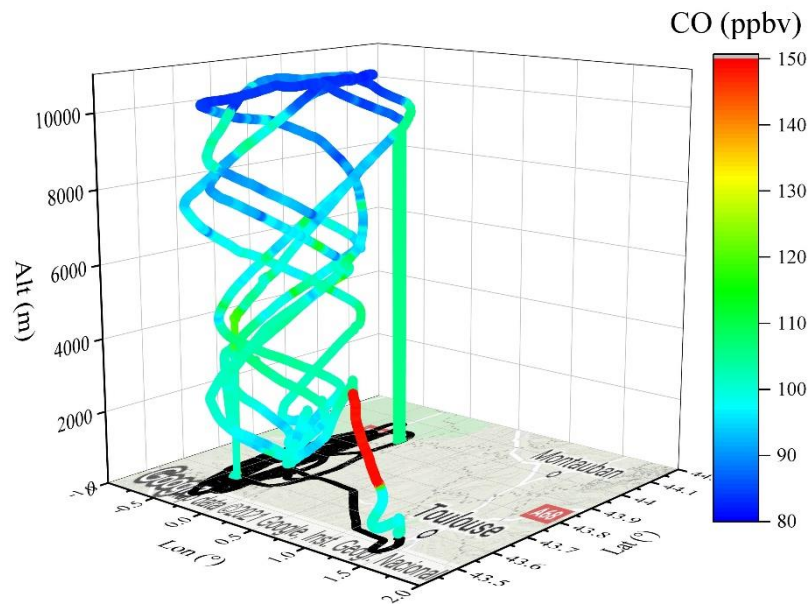

Figure S56: Flight trajectory colored by CO levels on flight-20190613\_1. Map copyright: © GoogleMap.

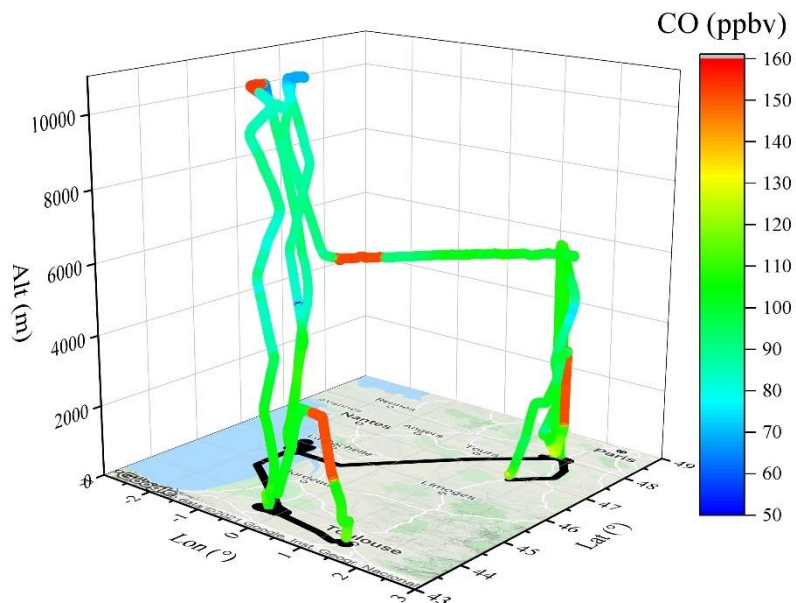

Figure S57: Flight trajectory colored by CO levels on flight-20190618\_1. Map copyright: © GoogleMap.

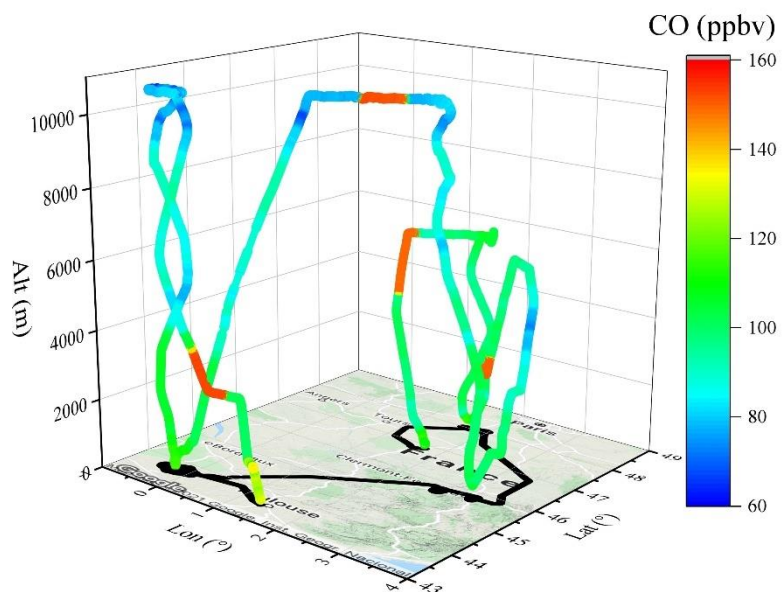

Figure S58: Flight trajectory colored by CO levels on flight-20190618\_2. Map copyright: © GoogleMap.

## 8. Flights during the MAGIC-2021 campaign

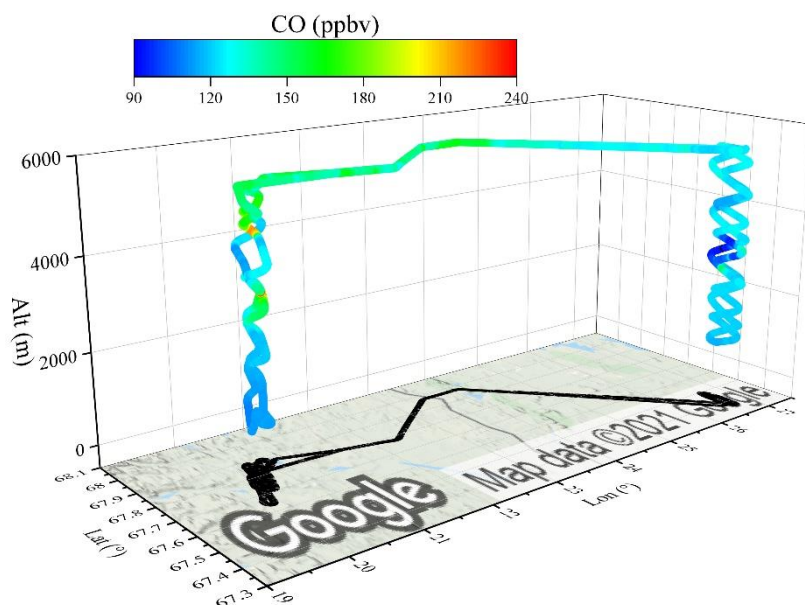

Figure S59: Flight trajectory colored by CO levels on flight-20210817\_1. Map copyright: © GoogleMap.

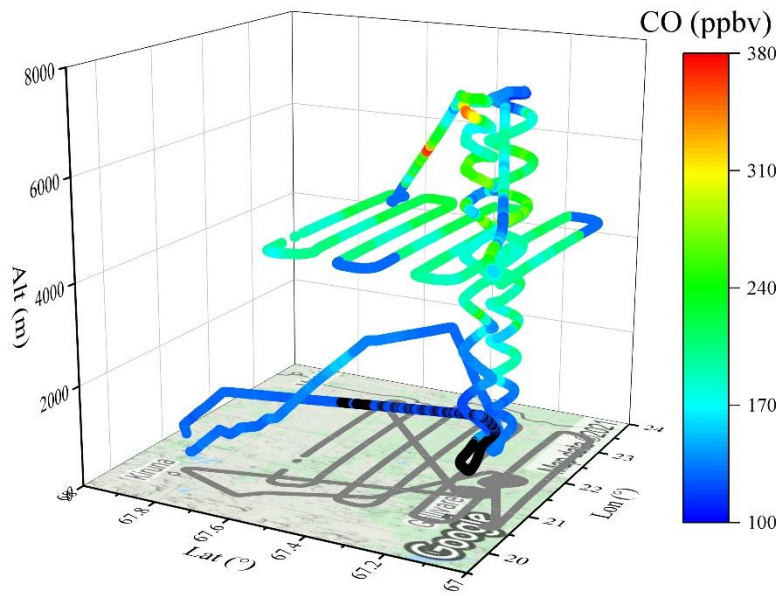

Figure S60: Flight trajectory colored by CO levels on flight-20210823\_1. Map copyright: © GoogleMap.

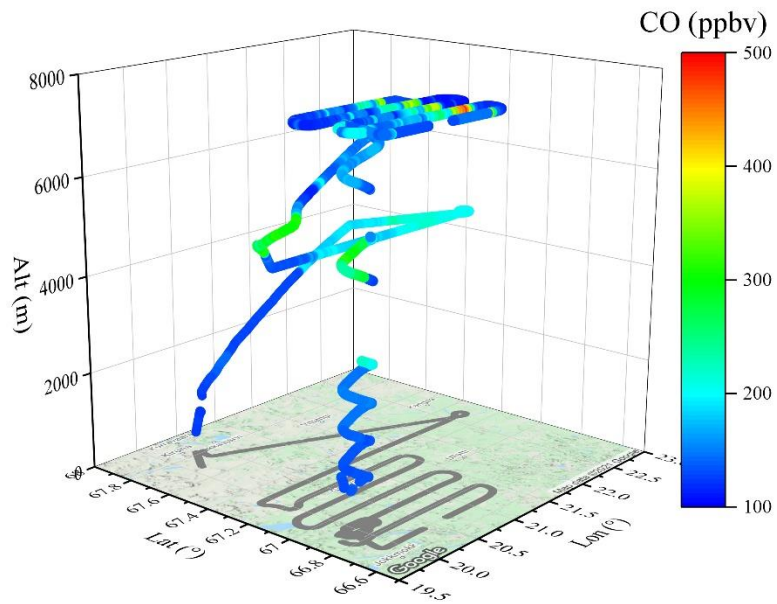

Figure S61: Flight trajectory colored by CO levels on flight-20210823\_2. Map copyright: © GoogleMap.

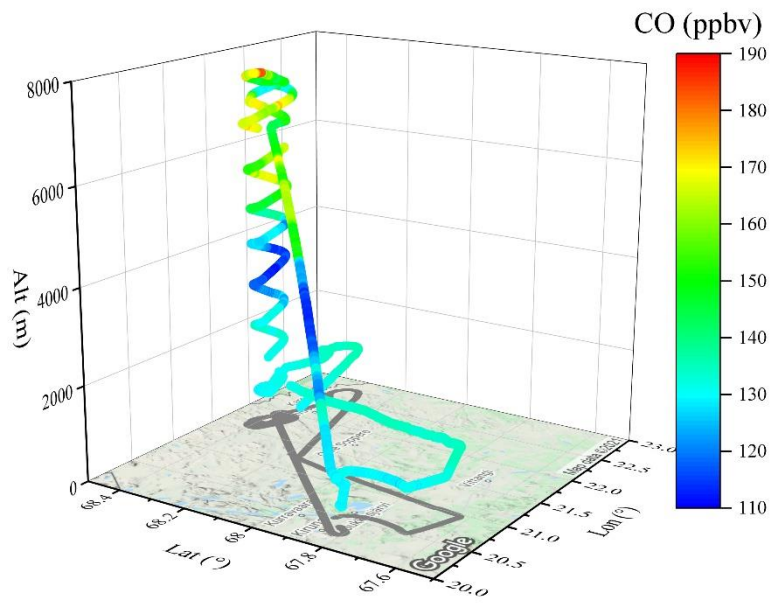

Figure S62: Flight trajectory colored by CO levels on flight-20210824\_1. Map copyright: © GoogleMap.

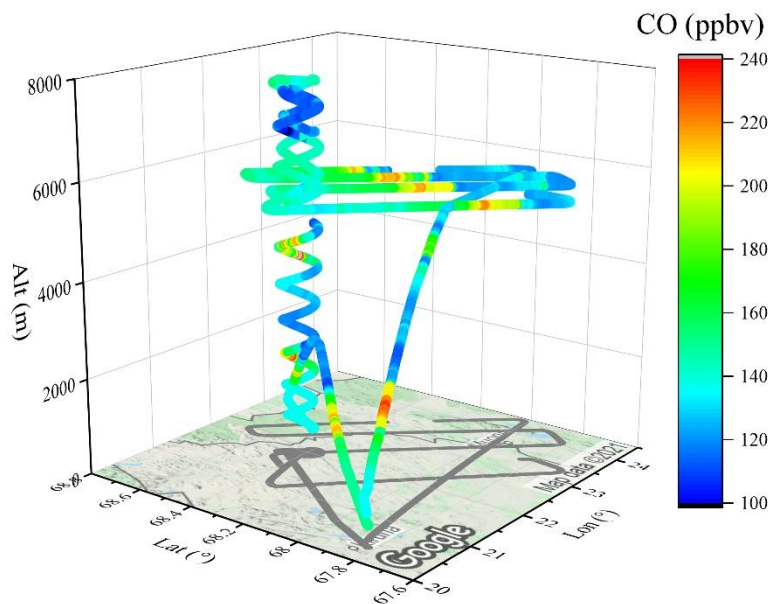

Figure S63: Flight trajectory colored by CO levels on flight-20210826\_1. Map copyright: © GoogleMap.

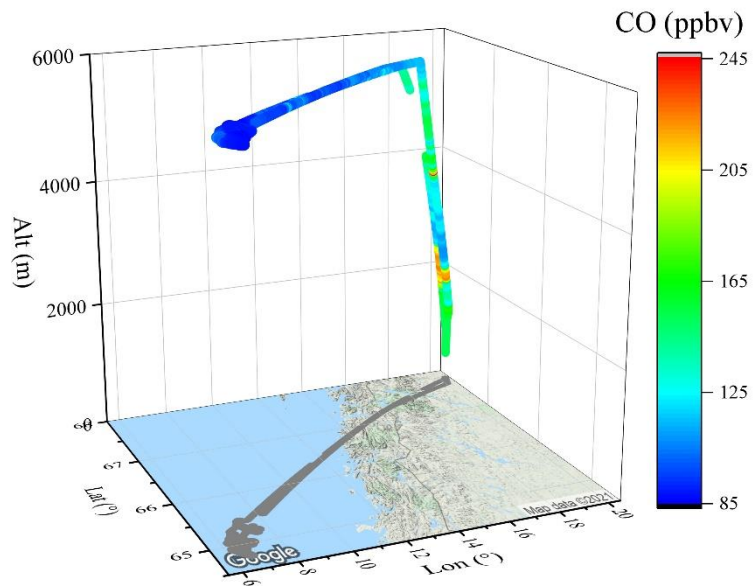

Figure S64: Flight trajectory colored by CO levels on flight-20210826\_2. Map copyright: © GoogleMap.

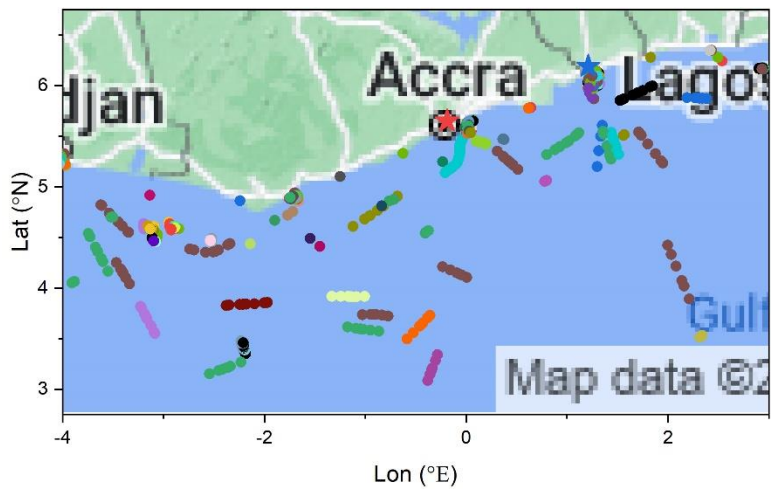

Figure S65: Ship position on 7 July 2016 (Date source: Marine Traffic). The red and the blue stars represent Accra and Lomé ports, respectively. © GoogleMap.
